# 1 Eye-movement reinstatement and neural reactivation 2 during mental imagery

3 Michael B. Bone<sup>1,2,\*</sup>, Marie St-Laurent<sup>1</sup>, Christa Dang<sup>1</sup>, Douglas A. McQuiggan<sup>1</sup>,  
4 Jennifer D. Ryan<sup>1,2</sup>, Bradley R. Buchsbaum<sup>1,2</sup>

## 5 Abstract

6 Half a century ago, Donald Hebb posited that mental imagery is a constructive process that  
7 emulates perception. Specifically, Hebb claimed that visual imagery results from the reactivation  
8 of neural activity associated with viewing images. He also argued that neural reactivation and  
9 imagery benefit from the re-enactment of eye movement patterns that first occurred at viewing  
10 (fixation reinstatement). To investigate these claims, we applied multivariate pattern analyses to  
11 functional MRI (fMRI) and eye-tracking data collected while healthy human participants  
12 repeatedly viewed and visualized complex images. We observed that the specificity of neural  
13 reactivation correlated positively with vivid imagery and with memory for stimulus image  
14 details. Moreover, neural reactivation correlated positively with fixation reinstatement, meaning  
15 that image-specific eye movements accompanied image-specific patterns of brain activity during  
16 visualization. These findings support the conception of mental imagery as a simulation of  
17 perception, and provide evidence of the supportive role of eye-movement in neural reactivation.

---

<sup>1</sup> Rotman Research Institute at Baycrest; Toronto, Ontario,  
M6A 2E1; Canada

<sup>2</sup> Department of Psychology; University of Toronto; Toronto, Ontario,  
M5S 1A1; Canada

\* Lead Contact. Correspondence: michael.bone@mail.utoronto.ca

18 The idea that mental imagery involves the reactivation of neural activity patterns elicited at  
19 perception has now been firmly established<sup>1-7</sup>. To date, much of the work on the neural basis of  
20 visual imagery has examined the phenomenon as if mental images were visual snapshots  
21 appearing in their totality to a passive inner observer, with few exceptions<sup>8</sup>. However, mental  
22 imagery is an active, constructive process<sup>9,10</sup> that is subject to the very kinds of capacity  
23 limitations that constrain perception and working memory<sup>11</sup>, leading some to propose that people  
24 engage with mental images in much the same way as they explore the sensory world—using eye-  
25 movements to shift the focus of attention to different parts of a mental image<sup>12-19</sup>. To date,  
26 however, there is scant neuroscientific evidence showing that eye-movement patterns are related  
27 to the neural representations that support mental imagery for complex visual scenes.

28 In a seminal paper<sup>12</sup>, Donald O. Hebb proposed a theory of mental imagery comprising  
29 three core claims: 1) imagery results from the reactivation of neural activity associated with the  
30 sequential perception of “part-images” (i.e. the spatially organized elements of a mental image);  
31 2) analogous to the role of saccades and fixations during perception, eye movements during  
32 imagery temporally organize the neural reinstatement of such “part-images”, thereby facilitating  
33 imagery by reducing interference between different image parts; and, 3) the vividness and detail  
34 of mental imagery is dependent on the order (first-, second-, third-order, etc.) of neuronal cell  
35 assemblies undergoing reactivation, such that reactivation extending into lower order visual  
36 regions would elicit greater subjective vividness than reactivation limited to higher-order areas.

37 Hebb’s first claim that imagery requires the reinstatement of perceptual neural activity  
38 has received considerable empirical support over the last decade. The advent of multi-voxel  
39 pattern analysis<sup>20</sup> (MVPA) has facilitated the assessment of neural reactivation, which is when

40 stimulus-specific activity patterns elicited at perception are reactivated during retrieval<sup>21,22</sup>.  
41 Researchers have consistently reported substantial similarities between neural regions activated  
42 by visual imagery and visual perception<sup>2,3,23</sup>, and there is now significant evidence that measures  
43 of neural reinstatement reflect the content<sup>4-7,24</sup> and vividness<sup>25-28</sup> of mental imagery.

44 Hebb's third claim that vivid mental imagery is the result of neural reinstatement within  
45 early visual areas (e.g. V1) has also received some neuroscientific support, although evidence is  
46 more limited. While the hierarchical organization of the visual cortex is well understood<sup>29-32</sup>, the  
47 precise manner in which mental imagery is embedded in this representational structure is still a  
48 matter of debate<sup>33,34</sup>. Recently, Naselaris and colleagues<sup>5</sup> showed that visualizing an image leads  
49 to the activation of low-level visual features specific to that image within early visual areas V1  
50 and V2, supporting earlier work<sup>2,35</sup>. Some tentative evidence that reactivation within early visual  
51 areas correlates with the vividness of mental imagery has also emerged<sup>36</sup>, although the results  
52 grouped together the striate and extrastriate cortices, leaving the relation between reinstatement  
53 within V1/V2 and vividness unresolved.

54 In contrast to Hebb's other two claims, support for his claim that eye movements  
55 facilitate neural reactivation during imagery remains largely at the behavioral level. Research  
56 indicates that stimulus-specific spatiotemporal fixation patterns elicited during perception are  
57 reinstated during retrieval<sup>13-15,37,38</sup>, even in complete darkness<sup>17</sup>. Furthermore, this phenomenon  
58 of fixation reinstatement appears to facilitate mental imagery<sup>16,18,38,39</sup>—although, some  
59 countervailing evidence exists<sup>15,40,41</sup>. If eye-movements facilitate mental imagery by coordinating  
60 shifts of attention to the elements of a remembered visual scene, then it follows that eye-  
61 movement reinstatement should be associated with neural reactivation of distributed memory

62 representations. To date, however, there is little neuroscientific evidence supporting this  
63 foundational claim of a link between eye movement and imagery.

64         The goal of the present study was therefore to examine how neural reactivation evoked  
65 during mental imagery was related to concurrently measured eye-movement patterns. To capture  
66 neural reactivation and eye-movement reinstatement, we collected functional MRI (fMRI) and  
67 eye tracking data simultaneously while 17 healthy participants viewed and visualized a set of  
68 complex colored photographs. In the encoding (perception) condition, participants were  
69 repeatedly shown a set of 14 images identified by a unique title and were instructed to remember  
70 them in detail. Participants then visualized these images in the retrieval (mental imagery)  
71 condition. While this aspect of the experiment is not the focus of the current report, our paradigm  
72 was also designed to examine how recency of stimulus presentation influenced neural  
73 reactivation patterns. Each retrieval trial began with a sequence of three images (from the set of  
74 14) shown in rapid succession, followed by a cue (title) that identified an image from the set.  
75 Participants visualized the image that matched the title, and then rated the vividness of their  
76 mental image (Figure 1, In-Scan Task). The recency of the image to be visualized was  
77 manipulated in four conditions: long term memory (LTM), wherein the visualized image was not  
78 among the three-image sequence; and working memory 1, 2 and 3 (WM1, WM2, WM3),  
79 wherein the visualized image was presented in the first, second or third position in the three-  
80 image sequence. A post-scan task completed immediately after scanning (Figure 1, Post-Scan  
81 Task) served as a behavioral measure of memory acuity. As in the in-scan retrieval condition,  
82 participants were shown a sequence of three images (from the in-scan stimulus set) in rapid  
83 succession, immediately followed by an image from the set that was either intact or modified

84 (Figure 2). Participants were required to determine whether a subtle change had been made to the  
85 image.

86 We applied MVPA to the fMRI signal to quantify the specificity of neural reactivation  
87 during mental imagery. We also developed a multivariate spatial similarity analysis method  
88 which we applied to the eye tracking data to quantify image-specific patterns of fixation  
89 reinstatement. Based on Hebb's claim that fixation reinstatement should contribute to neural  
90 reactivation, we hypothesized that the two metrics should correlate positively, and that the  
91 correlation should be strongest at corresponding retrieval time points (i.e. when comparing  
92 fixation reinstatement at retrieval-time  $x$  with neural reinstatement at retrieval-time  $x$ ). Moreover,  
93 we hypothesized that individuals capable of conjuring up detailed memories for stimulus items  
94 would rely more heavily on eye-movements. If so, we expected post-scan behavioral memory  
95 performance to be consistent with in-scan metrics of fixation reinstatement as well as neural  
96 reactivation. Finally, we examined Hebb's claim that reactivation within early visual areas  
97 should contribute positively to the vividness of mental imagery. For this, we correlated perceived  
98 vividness with neural reactivation in pre-defined visual cortical regions that included the  
99 occipital pole and calcarine sulcus.

100 Our results revealed widespread neural reactivation throughout the time period allocated  
101 for visualization. Of interest, imagery vividness ratings correlated positively with reactivation in  
102 regions that included the occipital lobe, the ventral and dorsal visual cortex, as well as the  
103 calcarine sulcus. Of central importance to our study, neural reactivation was found to correlate  
104 positively with fixation reinstatement—even after controlling for neural activity that may have  
105 reflected eye movements and fixation position rather than stimulus representations held in

106 memory. The correlation between fixation reinstatement and neural reactivation was strongest  
107 when comparing corresponding time points from retrieval trials. To our knowledge, these results  
108 provide the first neuroscientific evidence for Hebb's claim regarding the role of eye movement in  
109 mental imagery, as well as support for modern theories of fixation reinstatement, which posit a  
110 critical role for eye-movements in the facilitation of memory retrieval<sup>42,43</sup>.

## Stimulus Set

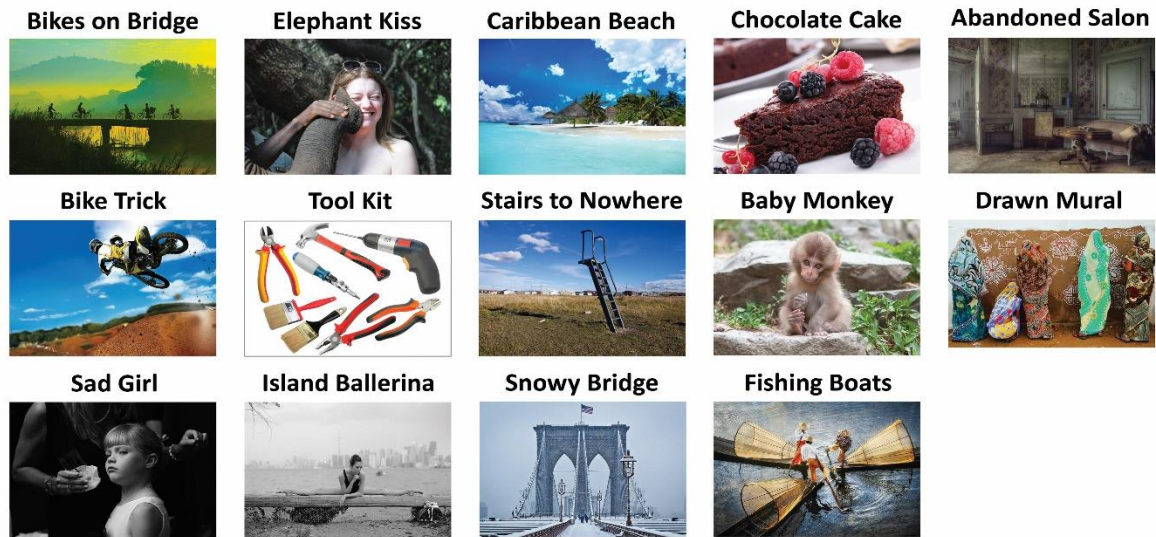

## In-Scan Task

### Encoding

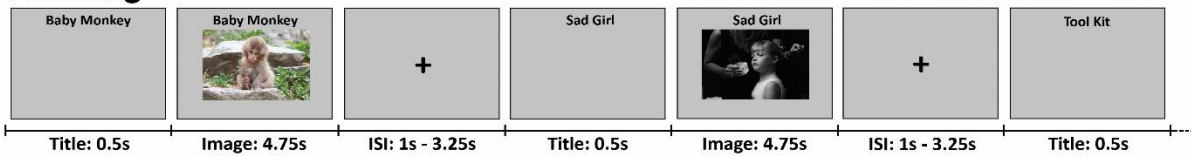

### Retrieval

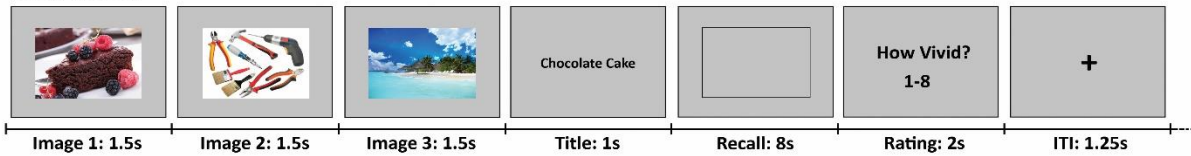

## Post-Scan Task

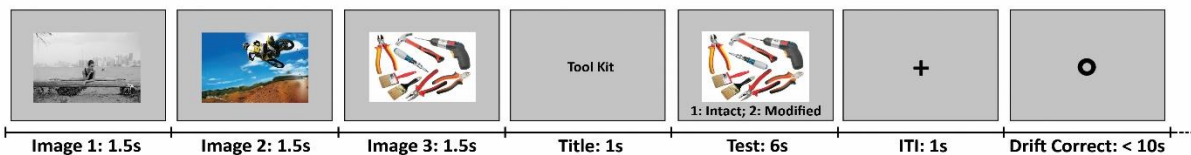

111

112 **Figure 1. Image Stimuli and Task Procedures.** See Methods for an in-depth description  
 113 of the tasks.

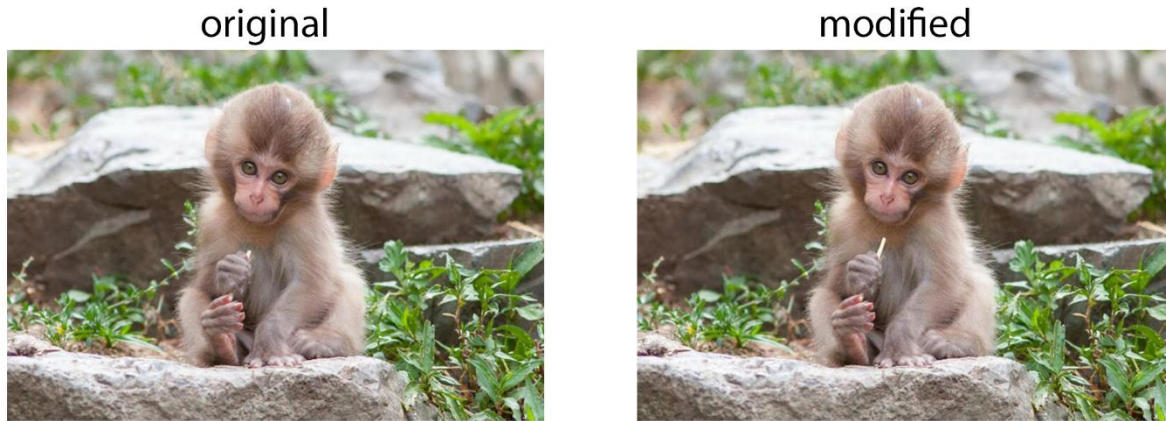

114

115        **Figure 2. Post-Scan Image Modification.** One example of the small modifications that  
116 participants were asked to detect during the post-scan behavioral task. Shown images were  
117 either modified (right) or identical to the original image (left) held in memory. In this case,  
118 the twig the monkey is holding has been lengthened.

## 119 Results

### 120 Relation between Fixation Reinstatement and Neural Reactivation

121 We first asked whether patterns of eye fixations made during image encoding are reinstated  
122 when the image is visualized at recall. We tested this hypothesis by computing pairwise  
123 similarity measures of fixation patterns captured at encoding and recall, which is a form of  
124 “representational similarity analysis”<sup>44</sup> applied to eye-movements. Importantly, participants tend  
125 to “contract” their patterns of fixations towards the center of the screen during visualization  
126 relative to encoding<sup>14,45,46</sup>. To account for this tendency, we developed a method of spatial  
127 fixation pattern alignment based upon the orthogonal Procrustes transform<sup>47,48</sup>. To calculate the  
128 measure, two-dimensional fixation density maps were generated for encoding and retrieval  
129 trials<sup>49,50</sup>. For each participant, the Procrustes transform was applied, using leave-one-trial-out



130 cross-validation, to spatially align the encoding and retrieval fixation maps. Finally, a trial-  
131 specific fixation reinstatement score was calculated by comparing the aligned retrieval trial  
132 map's correlation with the encoding map of the visualized image, relative to that trial map's  
133 average correlation with the remaining 13 encoding maps (see Methods for a detailed description  
134 of the measure). Using this novel measure—which greatly outperformed a traditional (unaligned)  
135 approach, as measured by recalled image classification accuracy—fixation reinstatement was  
136 observed within all recency conditions, with no significant difference between conditions (see  
137 Supplementary Figure 1 and Supplementary Table 1).

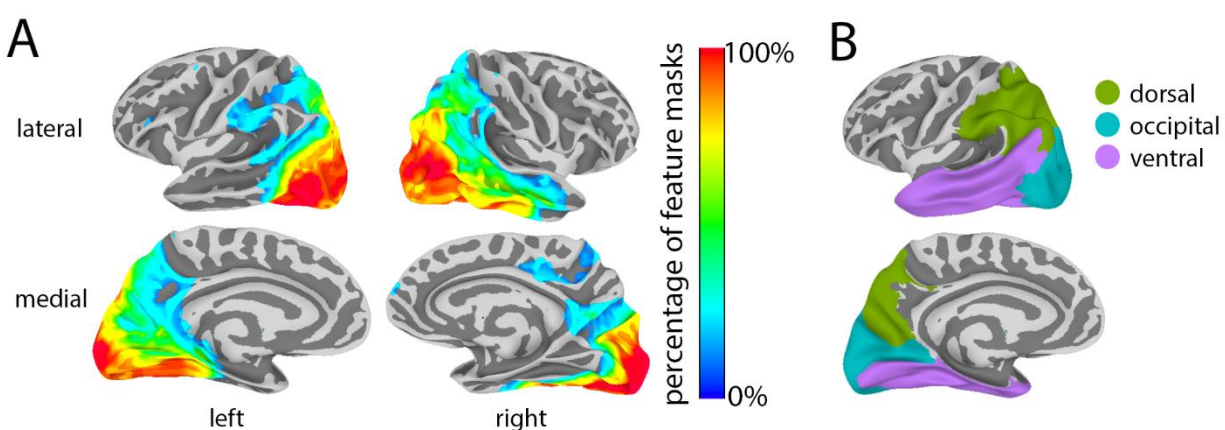

138

139 **Figure 3. Surface maps of feature and two-stream ROI masks.** A) Percentage of  
140 subject-specific feature masks that contain each voxel. Thresholded at 10%. B) Two-  
141 stream ROI masks. See Supplementary Table 5 for a list of the FreeSurfer ROIs that  
142 compose each region.

143 To assess neural reactivation, we trained a multivariate pattern classifier to discriminate each  
144 of the 14 images using brain imaging data from the three runs of encoding task. The trained  
145 classifier was then applied to the data from the retrieval task to yield a time point-by-time point  
146 estimate of classifier evidence over the course of the visualization window (“cross-  
147 decoding”<sup>51,52</sup>). We performed this analysis across the whole brain using feature-selection, which

148 identified voxels concentrated in the posterior half of the brain (Figure 3A). Separate analyses  
149 were performed within dorsal, occipital, and ventral cortical regions of interest (ROIs) (Figure  
150 3B and Supplementary Table 5) to separate reactivation in early visual cortex and ventral visual  
151 cortex from regions associated with spatial overt attention/eye movements (e.g. intraparietal  
152 sulcus) while minimizing multiple comparisons. Neural reactivation was found within the whole-  
153 brain and all ROIs for all recency conditions (see Supplementary Figure 2 and Supplementary  
154 Table 2).

155 Having observed that fixation reinstatement and neural reactivation were both present during  
156 our imagery task, we then examined the relationship between the two phenomena. To calculate  
157 the correlation between neural reactivation and fixation reinstatement, it was necessary to model  
158 several fixed and random factors—including participant, recency condition (LTM, WM1, etc.),  
159 recalled image, and recall number (the number of times the current trial’s target image had been  
160 previously recalled)—so we used a linear mixed-effects (LME) model. In an analysis of the data  
161 from all retrieval trials, we modeled neural reactivation (trial-specific adjusted classifier  
162 performance) as a dependent variable (DV), fixation reinstatement (trial-specific fixation  
163 reinstatement score) and recall number as scalar independent variables (IV), recency condition as  
164 a categorical IV, and participant and image as crossed random effects (random-intercept only,  
165 due to model complexity limitations). Statistical assessments were performed using bootstrap  
166 analyses.

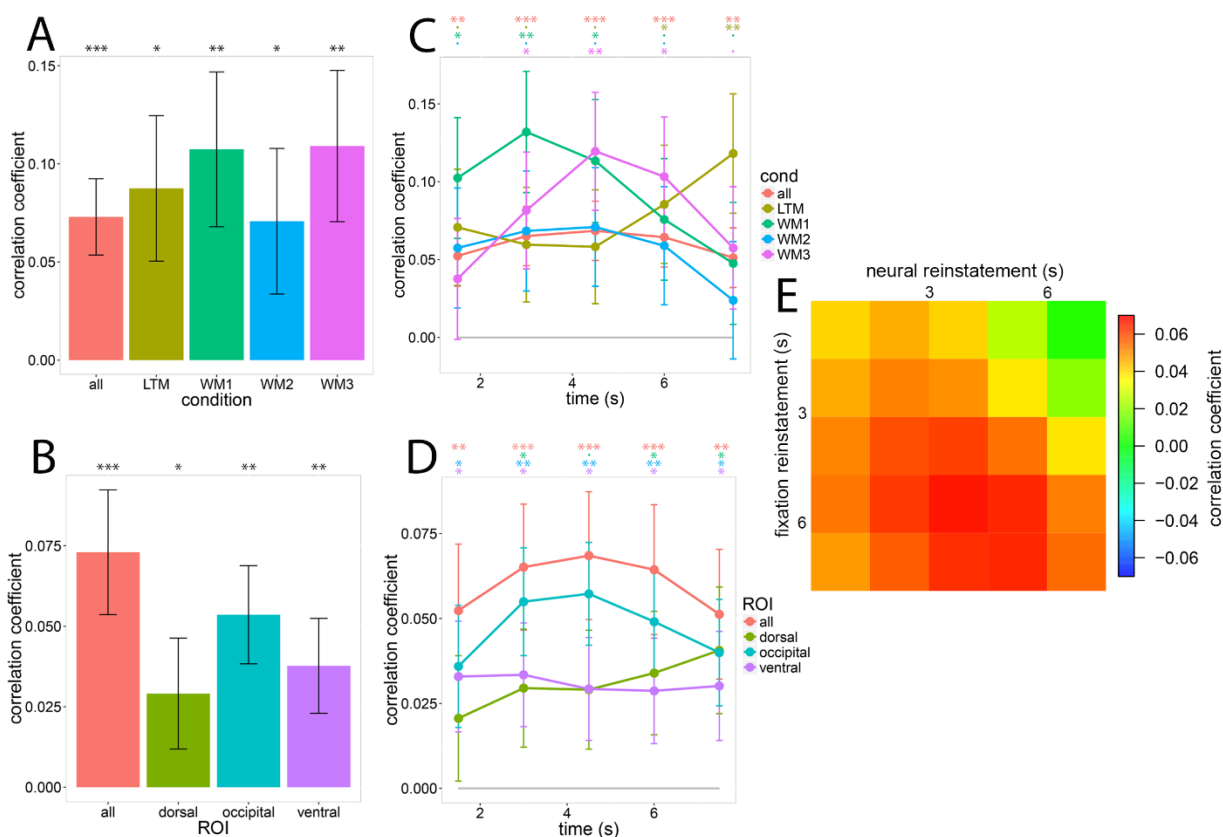

167

168 **Figure 4. Correlation Between Fixation Reinstatement and Neural Reactivation.** Data  
 169 are represented as correlation coefficient  $\pm$  1 SE; FDR corrected one-tailed p-value:  $\cdot < .1$ ,  
 170  $* < .05$ ,  $** < .01$ ,  $*** < .001$ . **A)** The correlation between fixation reinstatement and neural  
 171 reactivation for each recency condition. The “all” category, which was included in multiple  
 172 graphs as a point of reference, refers to the full-brain measure that included all recency  
 173 conditions. **B)** The correlation between fixation reinstatement and neural reactivation for  
 174 each ROI. **C)** The correlation between fixation reinstatement and neural reactivation for  
 175 each recency condition divided into retrieval-period temporal windows. **D)** The correlation  
 176 between fixation reinstatement and neural reactivation for each ROI divided into retrieval-  
 177 period temporal windows. **E)** The correlation between fixation reinstatement and neural  
 178 reactivation divided into retrieval-period temporal windows, wherein the columns are  
 179 neural reactivation windows and the rows are fixation reinstatement windows. See also  
 180 Supplementary Table 3.

181 Figures 4A and 4B illustrate the correlation between fixation reinstatement and neural  
 182 reactivation. After correcting for multiple comparisons (FDR with one-tailed alpha set to .05),  
 183 fixation reinstatement correlated positively with reactivation within the feature-selected full-

184 brain when trials from all recency conditions were included (the “all” measure). Correlations  
185 specific to recency conditions or limited to signal from specific ROIs were also significant (FDR  
186 corrected). We addressed the possibility that the observed correlations were driven by *fMRI*  
187 signals caused by similar eye movements made at encoding and retrieval, rather than imagery-  
188 related neural patterns *per se*. If true, the similarity between patterns of eye motion made at  
189 encoding and at retrieval would result in greater correspondence between patterns of brain  
190 activity irrespective of the image being brought to mind (i.e. through random/accidental  
191 correlations between eye-movement patterns unrelated to image content). We tested this  
192 hypothesis by performing a randomization test for which we generated a null distribution of 1000  
193 randomized “all” correlations (see Methods). For each randomized sample, we randomly  
194 reassigned the labels of the visualized images (e.g., all retrieval trials for which “Stairs to  
195 Nowhere” was the target image were relabeled as “Chocolate Cake”), and recalculated fixation  
196 reinstatement, neural reactivation and their correlation. We found the true “all” correlation to be  
197 significantly greater than this null distribution ( $p = .006$ ), providing strong evidence that the  
198 relationship between neural activity and fixations is explained by imagery, and not merely by  
199 eye-movement induced patterns unrelated to mental imagery.

200         Figures 4C and 4D show the correlation between fixation reinstatement and neural  
201 reactivation across the eight-second visualization period. For the feature-selected full-brain  
202 correlation including all recency conditions, labeled “all”, the correlation peaked approximately  
203 in the middle of the visualization period with all windows significantly greater than zero.  
204 Correlations specific to ROIs and recency conditions displayed no consistent temporal pattern,  
205 although all groups had at least one significant temporal window—except for ‘WM2’ (FDR

206 corrected). No significant effects were uncovered by a three-way (ROI by recency condition by  
207 time) repeated-measures ANOVA performed on the ROI-specific (dorsal, occipital, ventral)  
208 correlation data (all  $ps > .30$ ).

209 Figure 4E shows the relationship between fixation reinstatement and full-brain neural  
210 reactivation over time. If eye movements during imagery temporally organize the neural  
211 reinstatement of part-images, we hypothesized that the correlation between fixation  
212 reinstatement and neural reactivation would be strongest when both measures overlapped in  
213 time, i.e. neural reactivation at time  $x$  should correlate most strongly with fixation reinstatement  
214 at time  $x$ . Qualitatively, the diagonal trend from top-left to bottom-right in figure 4E supports this  
215 hypothesis. To test this observation, we first calculated separate correlations between fixation  
216 reinstatement and neural reactivation for each time-point combination and each participant. Each  
217 correlation was calculated using the LME approach described above, with the exception that  
218 participant was not included as a random effect. We then performed an LME analysis with the  
219 correlations between fixation reinstatement and neural reactivation as the DV, fixation  
220 reinstatement time and neural reactivation time (1-5 scalar valued) as IVs, the absolute difference  
221 between fixation reinstatement time and neural reactivation time as an IV, and participant as a  
222 random effect. Statistical assessments were performed using bootstrap analyses. We found that  
223 the absolute difference between fixation reinstatement time and neural reactivation time  
224 correlated negatively with the correlation between fixation reinstatement and neural reactivation  
225 ( $r = -.083$ ,  $p = .035$ ). In other words, fixation reinstatement and neural reactivation measures  
226 were more consistent with each other when taken from time bins that were closer in time,  
227 indicating a temporal relationship between the two measures. Overall, the results are consistent

228 with Hebb's claim that eye movements facilitate the neural reinstatement of part-images during  
229 mental imagery.

## 230 Post-Scan Memory Task Performance and Vividness Ratings

231 The final analyses investigated post-scan memory task performance, vividness ratings and their  
232 relation to neural reactivation and fixation reinstatement. Our goal was two-fold: 1) assess  
233 whether trials that received high vividness ratings (a subjective measure of imagery) also ranked  
234 highly on fixation reinstatement and neural reactivation measures, and 2) determine whether  
235 individuals with more detailed memories (those who performed better on the post-scan  
236 behavioral memory test) had more specific memory representations (as revealed by in-scan  
237 neural reactivation) and relied more heavily on eye-movement recapitulation during imagery.

238 The post-scan memory task was designed to be difficult, but participants performed  
239 above chance, with each individual providing more correct than incorrect answers (% correct:  
240 mean = 64.8,  $p(\text{less than or equal to chance at } 50\%) < .0001$ ; statistics calculated with bootstrap  
241 analyses). To determine whether individuals with good post-scan memory performance (%  
242 correct) also obtained high fixation reinstatement and neural reactivation scores, we first  
243 computed average fixation reinstatement and neural reactivation scores for each participant, and  
244 then we correlated these values with the participants' memory performance. We covaried out  
245 head motion using the maximum displacement (mm) for each subject within the scanner using  
246 standard multiple regression. Bootstrap analyses were used to calculate the statistics. Post-scan  
247 memory performance correlated strongly with neural reactivation ( $r = .624$ ,  $p = .0003$ , one-  
248 tailed), but did not correlate with fixation reinstatement ( $r = -.015$ ,  $p = .51$ , one-tailed).

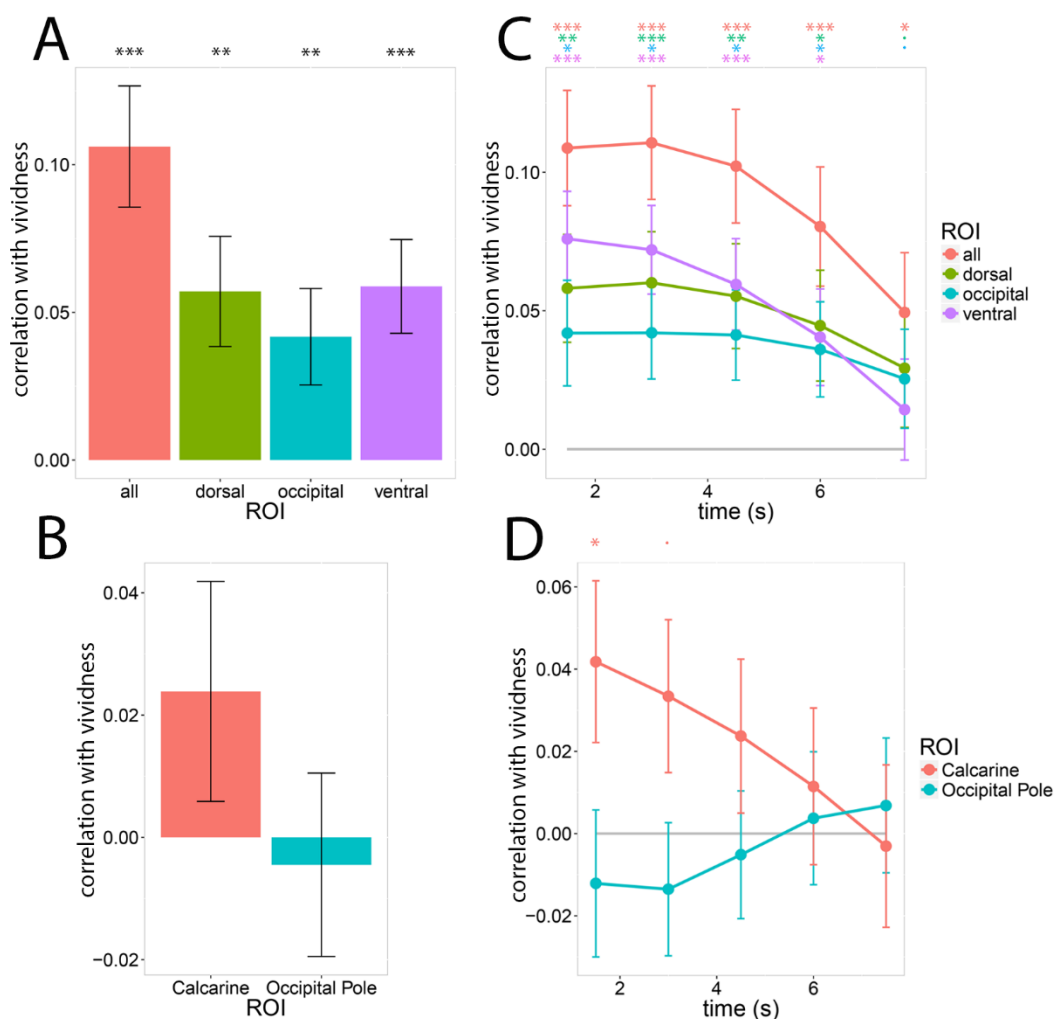

249

250 **Figure 5. Correlation Between Vividness Rating and Neural Reactivation.** Data are  
 251 represented as correlation coefficient  $\pm$  1 SE; FDR corrected one-tailed p-value:  $\cdot < .1$ ,  $* <$   
 252  $.05$ ,  $** < .01$ ,  $*** < .001$ . **A)** The correlation between vividness rating and neural  
 253 reactivation for each ROI. The “all” category refers to the full-brain measure which  
 254 included all recency conditions. **B)** The correlation between vividness rating and neural  
 255 reactivation for the calcarine sulcus and occipital pole. **C)** The correlation between  
 256 vividness rating and neural reactivation for each ROI divided into retrieval-period temporal  
 257 windows. **D)** The correlation between vividness rating and neural reactivation for the  
 258 calcarine sulcus and occipital pole divided into retrieval-period temporal windows. FDR  
 259 multiple comparison correction was applied sequentially, starting at the first time-point.  
 260 See also Supplementary Table 4.

261 Given previous findings of a positive correlation between vividness ratings and neural  
 262 reinstatement<sup>26,36</sup>, we set out to replicate these results, and also to assess whether fixation

263 reinstatement correlated with vividness in the same manner. The within-subject correlations were  
264 calculated with a LME model on data from all retrieval trials, wherein either neural reactivation  
265 or fixation reinstatement was the dependent variable (DV), Vividness rating and recall number  
266 were entered as scalar independent variables (IV), recency condition was a categorical IV, and  
267 participant and image were crossed random effects (random-intercept only, due to model  
268 complexity limitations). Statistical assessments were performed using bootstrap analyses.  
269 Consistent with previous findings, vividness ratings (1-8 scale wherein 1 is very-low and 8 is  
270 very-high; mean = 5.57, SD = 1.42) correlated positively with full-brain measures of neural  
271 reinstatement (Figure 5A), indicating that image-specific patterns of neural reactivation—an  
272 index of memory representation—were more specific during trials perceived as more vivid by  
273 the participants. Vividness also correlated with reactivation within the ventral, dorsal and  
274 occipital ROIs (Figure 5A and 5C). A two-way (ROI by time) repeated-measures ANOVA  
275 revealed that the effects of ROI, time and their interaction were not significant (ROI:  $F(1.81,$   
276  $28.90) = .86, p = .42$ ; time:  $F(2.23, 17.87) = 2.46, p = .13$ ; ROI-time interaction:  $F(2.04, 32.71) =$   
277  $2.39, p = .11$ ). Against our hypothesis, no significant positive correlation was observed between  
278 vividness and fixation reinstatement ( $r = .026, p = .10$ , one-tailed).

279 We also tested Hebb's claim<sup>12</sup> that neural reactivation in early visual areas elicited more  
280 vivid visual mental imagery. Looking specifically at the signal from early visual ROIs, namely  
281 the occipital pole and calcarine sulcus, we found no significant correlations between reactivation  
282 and vividness after FDR correction (Figure 5B and 5D). A two-way (ROI by time) repeated-  
283 measures ANOVA revealed that the effects of ROI, time and their interaction were non-  
284 significant (ROI:  $F(1, 16) = 1.90, p = .18$ ; time:  $F(1.46, 23.37) = 1.25, p = .29$ ; ROI by time



285 interaction:  $F(1.33, 21.33) = 2.00, p = .16$ ). Because neural reinstatement decreased  
286 approximately linearly over retrieval time (Supplementary Figure 2), an ANOVA—which does  
287 not assume any relation between time points—may be underpowered. To address this issue, we  
288 ran an LME model that assumed a linear relation between time points. In this model, the  
289 correlation between vividness and neural reinstatement, calculated for each subject-ROI-time  
290 combination, was the DV; ROI, time and their interaction were IVs; and participant was a  
291 random effect. The main effect of ROI and the ROI-time interaction were significant, indicating  
292 that the correlation between neural reinstatement and vividness was significantly stronger within  
293 the calcarine sulcus than the occipital pole—particularly near the start of the visualization period  
294 (ROI: coefficient = .183,  $p = .0058$ ; time: coefficient = -.109,  $p = .09$ ; ROI-time interaction:  
295 coefficient = -.146,  $p = .024$ ; calculated via bootstrap analyses). Based upon this finding, we re-  
296 analyzed the correlation between vividness and neural reactivation over time by assessing each  
297 time window sequentially, starting from the beginning of the visualization period and including  
298 all previous time windows in a multiple comparison analysis using FDR. Using this method, we  
299 found the first (0-1.5 sec) visualization time window for the calcarine sulcus to be significant (0-  
300 1.5 sec:  $r = .041, p = .03$ , one-tailed), whereas all other windows for both ROIs were not  
301 significant.

302 To determine whether these results were limited by our ability to detect neural  
303 reactivation in these early visual regions, we assessed neural reactivation over time within the  
304 occipital pole and calcarine sulcus. We performed random effects (subjects and items) bootstrap  
305 analyses for each retrieval time point—controlling for multiple comparisons by assessing the  
306 time points sequentially using FDR, as described above. Only the first visualization time window

307 (0-1.5 sec) was found to be significant for the calcarine sulcus (0-1.5 sec: adjusted classifier  
308 confidence (%) = 1.51,  $p = .03$ , one-tailed), mirroring the correlation results.

309         These results document the spatiotemporal relationship between neural reactivation and  
310 the perceived vividness of mental images. While we observed significant correlations between  
311 vividness and reactivation across the visual cortex, we found limited evidence in support of  
312 Hebb's claim<sup>12</sup> that reactivation in early visual cortices leads to vivid mental imagery. That being  
313 said, our capacity to detect reactivation in early visual cortices may have been affected by our  
314 study design, which allowed subjects to move their eyes during visualization, a limitation that we  
315 address further in the discussion.

## 316 Discussion

317 The primary goal of the current study was to test whether eye movements contribute to the  
318 creation of mental images by examining the relationship between fixation reinstatement—as  
319 measured by a novel Procrustes-transform-based algorithm—and neural reactivation. Our results  
320 provide significant evidence in favor of Hebb's claim<sup>12</sup> that eye movements help coordinate the  
321 construction of mental images. We observed a significant positive correlation between a novel  
322 measure of fixation reinstatement that accounts for the contraction of fixations during imagery,  
323 and neural reactivation. This correlation increased when fixation reinstatement and neural  
324 reactivation metrics were calculated for time points that were closer in time, demonstrating that  
325 the two phenomena peaked in synchrony, and establishing a link between eye movement and the  
326 neural mechanism of mental imagery.

327 Previous research has only assessed the link between fixation reinstatement and mental  
328 imagery using behavioral measures of imagery rather than neural reactivation. For example,  
329 Laeng and Teodorescu<sup>16</sup>, and Johansson et al.<sup>18</sup>, found that the degree of fixation reinstatement  
330 predicted behavioral performance on an imagery task. Thus, our findings provide the first direct  
331 neuroimaging evidence for Hebb's claim and the currently dominant fixation reinstatement  
332 theories<sup>14,40,42,43</sup>.

333 Our analyses also addressed the relationship between fixation reinstatement, neural  
334 reactivation and behavioral memory performance. Based on findings linking fixation  
335 reinstatement<sup>16,18</sup> and neural reactivation<sup>6,7,24</sup> to memory performance, we predicted that both in-  
336 scan fixation reinstatement and neural reactivation would correlate with performance on the post-  
337 scan memory task. We also predicted similar patterns of correlations with in-scan ratings of  
338 imagery vividness. Our results were partially congruent with these predictions. We observed that  
339 neural reactivation correlated strongly with both objective and subjective behavioral measures of  
340 memory performance, but that fixation reinstatement was a poor predictor of either form of  
341 behavior.

342 Research into the relationship between fixation reinstatement and memory acuity has  
343 been mixed<sup>53,15,40,16,18,38</sup>. For example, when fixations were constrained to a region that either did  
344 or did not correspond to the previous location of objects to be recalled, Johansson and  
345 Johansson<sup>39</sup> found that memory performance was superior in the "corresponding" condition,  
346 whereas Martarelli and Mast<sup>41</sup> did not. These inconsistent results may be due to differences in  
347 the features to be recalled: spatial features (orientation and relative position) in Johansson and  
348 Johansson<sup>39</sup>, and primarily non-spatial features (e.g. color) in Martarelli and Mast<sup>41</sup>. Consistent

349 with this interpretation, de Vito et al.<sup>54</sup> demonstrated that incongruent eye movements  
350 preferentially disrupt spatial recollection. Our objective measure of memory performance, the  
351 post-scan change detection task, included both spatial (e.g. size, position) and non-spatial (e.g.  
352 color, object identity) image modifications. Therefore, we may have observed a larger  
353 correlation between in-scan fixation reinstatement and post-scan change detection if the task only  
354 had spatial modifications. Similarly, subjective vividness ratings reflected an overall impression  
355 of the crispness of the mental image, rather than its spatial features.

356 In summary, we provided the first evidence that fixation reinstatement is linked to neural  
357 reactivation, thereby supporting one of the pillars of Hebb's theory of imagery, as well as current  
358 fixation reinstatement theories which also posit that reciprocal facilitation occurs between  
359 fixation reinstatement and internal memory representations<sup>42,43</sup>. Nonetheless, we must consider  
360 alternative interpretations of our results. It is possible that the observed correlation between  
361 fixation reinstatement and neural reactivation was predominantly driven by neural signals that  
362 reflected eye position, rather than the reactivation of a mental image. A randomization test  
363 designed to address this possibility provided strong evidence against this hypothesis. Moreover,  
364 positive correlations based on signal limited to the occipital and ventral ROIs provide further  
365 evidence against this hypothesis, as these ROIs exclude areas strongly associated with eye  
366 movement control, such as the frontal eye fields and posterior intraparietal sulcus<sup>55,56</sup>.

367 Finally, while our correlational findings reveal a relationship between eye movement and  
368 imagery, they cannot conclusively determine the causality and directionality of this relationship.  
369 To directly address this unresolved issue, future research could take advantage of the high  
370 temporal resolution of techniques such as magnetoencephalography to link distinct patterns of

371 neural activity to specific portions of seen and imagined complex images. If reciprocal  
372 facilitation occurs between fixation reinstatement and internal memory representations<sup>42,43</sup>, then  
373 neural reactivation should predict, and be predicted by, eye movements towards the location  
374 associated with the neural activity pattern.

375 We also tested Hebb's claim<sup>12</sup> that highly vivid mental imagery requires cortical  
376 reactivation within early visual areas, i.e. V1 and V2. As such, we hypothesized that reactivation  
377 within the occipital pole and the calcarine sulcus would correlate positively with vividness.  
378 Consistent with previous findings<sup>26,27,36</sup>, we observed correlations between vividness and  
379 reactivation within dorsal, ventral and occipital ROIs that were sustained throughout the retrieval  
380 trial. Looking specifically at early visual areas, a significant correlation was observed between  
381 vividness ratings and reinstatement within the calcarine sulcus (the brain region wherein V1 is  
382 concentrated<sup>57</sup>), but not the occipital pole, in the first 1.5 seconds of visualization.

383 The simplest explanation for the null result within the occipital pole is that vivid mental  
384 images can be conjured up without its contribution to neural reactivation. However, other factors  
385 need to be considered. First, St-Laurent, Abdi, and Buchsbaum<sup>26</sup> found that activity levels within  
386 the occipital pole correlated strongly and positively with the perceived vividness of videos  
387 mentally replayed from memory, which suggests that this area contributes to the perceived  
388 vividness of mental imagery. Second, we only observed evidence of neural reactivation during  
389 the first 1.5 seconds of visualization within the calcarine sulcus, and not within the occipital pole,  
390 mirroring our correlation results. This finding suggests that the observed correlation between  
391 reactivation within early visual regions and vividness was limited by our ability to detect  
392 reactivation within these regions.

393           Research by Naselaris et al.<sup>5</sup> provides strong evidence of reactivation of neural patterns  
394 associated with low-level visual features within the early visual cortex during scene imagery.  
395 One significant methodological difference between this study and our own is that the authors  
396 asked their participants to fixate centrally throughout their task, thereby eliminating the natural  
397 eye-movements that occur during mental imagery—which were the explicit focus of our study.  
398 This significant constraint on the participants' fixations would have eliminated the variance  
399 caused by the image's neural representation shifting across the retinotopically-organized early  
400 visual cortex due to eye movements, but at the cost of being able to study the functional role of  
401 eye-movements during imagery<sup>18</sup>. Note that the occipital pole and posterior calcarine sulcus are  
402 predominantly responsible for central vision, which has high spatial resolution, whereas the  
403 anterior calcarine sulcus is predominantly responsible for peripheral vision, which has relatively  
404 low spatial resolution<sup>57</sup>. Consequently, visual representations within the calcarine sulcus should  
405 be less sensitive to eye movements than visual representations within the occipital pole, which is  
406 consistent with our results. We therefore suspect that free eye-movements may have caused our  
407 null reactivation finding within the occipital pole. By extension, our methods could not  
408 adequately quantify the correlation between vividness and reactivation within the occipital pole  
409 and calcarine sulcus, and limited our capacity to test Hebb's claim that early visual cortical  
410 reactivation leads to vivid imagery. To preserve ecological validity, future research concerning  
411 neural reactivation during mental imagery should avoid artificial constraints on fixations, and  
412 instead develop and utilize measures of neural reactivation that explicitly model the effect of eye  
413 movements on neural activity within the visual cortex.

## 414 Conclusion

415 In conclusion, the results from this study support the three major claims of the Hebbian  
416 theory of mental imagery: 1) imagery involves the reinstatement of perceptual neural activity; 2)  
417 reinstatement of fixations during imagery facilitates neural reinstatement; 3) the vividness of  
418 mental imagery is associated with reactivation within early visual areas (calcarine sulcus). The  
419 findings reported here provide a promising avenue to establish how fixations contribute to the  
420 neural processes underlying mental imagery. Future work should clarify the fine-scale temporal  
421 relationship between eye-movement reinstatement and memory reactivation in a way that can  
422 unravel the causal connection between these interacting neural processes.

## 423 Methods

### 424 Participants

425 Twenty-three right-handed young adults (6 males and 17 females, 20-30 years old [mean: 24.1],  
426 14-21 years of education [mean: 16.9]) with normal or corrected-to-normal vision and no history  
427 of neurological or psychiatric disease were recruited through the Baycrest subject pool, tested  
428 and paid for their participation per a protocol approved by the Rotman Research Institute's  
429 Ethics Board. Subjects were either native or fluent English speakers and had no contraindications  
430 for MRI. Data from six of these participants were excluded from the final analyses for the  
431 following reasons: excessive head motion (2), poor eye tracking signal (1), misunderstood  
432 instructions (1), fell asleep (2). Thus, seventeen participants were included in the final analysis (5  
433 males and 12 females, 20-28 years old [mean: 23.8], 15-21 years of education [mean: 17.1]).

## 434 Stimuli

435 Nineteen complex colored photographs were gathered from online sources and resized to 757 by  
436 522 pixels in Adobe Photoshop. Five images were used for practice, and the remaining 14 were  
437 used during the in-scan and post-scan tasks (Figure 1). Each image was paired with a short  
438 descriptive title in 30-point Courier New font during in-scan encoding; this title served as a  
439 retrieval cue during the in-scan and post-scan memory tasks. Four different “modified” versions  
440 of each image were also created using Adobe Photoshop for a post-scan memory test: a minor  
441 local element of the image was either added, removed or transformed in a way that was realistic  
442 and congruent with the image (Figure 2).

## 443 Procedure

### 444 In-Scan

445 Before undergoing MRI, participants were trained on a practice version of the task incorporating  
446 five practice images. Inside the scanner, participants completed three encoding runs and six  
447 retrieval runs of functional MRI. To keep participants engaged with the task, we interspaced the  
448 encoding and the retrieval runs (each encoding run was followed by two retrieval runs). A high-  
449 resolution structural scan was acquired between the 6th (retrieval) and 7th (encoding) functional  
450 runs, which provided a mid-task break. Eye-tracking data was acquired during all functional  
451 runs.

452         Encoding runs were 7m 18s long. Each run started with 10s of warm up during which  
453 instructions were displayed on-screen. Each trial began with a title shown in the top portion of



454 the screen (0.5s; font = Courier New, font size = 30), followed by the appearance of the  
455 matching image in the center of the screen (4.75s; the title remained visible above the image).  
456 Images occupied 757 by 522 pixels of a 1024 by 768 pixel screen. Between trials, a cross-hair  
457 appeared in the center of the screen (font size = 50) for either 1s, 1.75s, 2.5s or 3.25s.  
458 Participants were instructed to pay attention to each image and to encode as many details as  
459 possible so that they could visualize the images as precisely as possible during the retrieval task.  
460 During the second and third encoding runs, participants were encouraged to pick up details they  
461 had missed and to integrate them into their memory representation. Each image was shown four  
462 times per run, for a total of 12 encoding trials per image throughout the experiment. Within each  
463 run, the entire set of images was shown in a randomized order before the set could be shown  
464 again (e.g. each image needed to be shown twice before an image could be presented for the  
465 third time).

466 Retrieval runs were 8m 17s long, starting with 13 seconds of warm up during which  
467 instructions appeared on-screen. Each trial began with three 757 by 522 images shown in  
468 succession in the center of the screen for 1.5s each. Then, an image title appeared in the center of  
469 the screen for 1s (font = Courier New, font size = 30). For most trials, this title matched one of  
470 the three images in the sequence. The first, second and third image from the sequence were each  
471 cued during working memory conditions 1, 2 and 3, respectively (WM1, WM2, and WM3).  
472 WM1, WM2 and WM3 trials each corresponded to 1/4 of the total number of trials. In the  
473 remaining 1/4 of trials, the title corresponded to an image from the stimulus set that was not  
474 included in the sequence (the long-term memory condition, LTM). After 1s, the title was  
475 replaced by an empty rectangular box shown in the center of the screen (8s), and whose edges

476 corresponded to the edges of the stimulus images (757 by 522 pixels). Participants were  
477 instructed to visualize the image that corresponded to the title as accurately and in as much detail  
478 as they could within the confines of the box. Once the box disappeared, participants were  
479 prompted to rate the vividness of their mental image on a 1-8 scale (2s) using two four-button  
480 fiber optic response boxes (one in each hand; 1 = left little finger; 8 = right little finger). Between  
481 each trial, a cross-hair (font size = 50) appeared in the center of the screen for 1.25s. Participants  
482 were instructed to attribute ratings of 4 or 5 for trials whose vividness felt “average for them”.  
483 There were 28 trials per run (seven trials in each condition: WM1, WM2, WM3 and LTM), and  
484 42 trials per condition for the entire scan.

## 485 Post-Scan

486 A post-scan test was conducted shortly after scanning to obtain behavioral measures of  
487 memory specificity as a function of task condition for the same 14 images encoded and retrieved  
488 inside the scanner. For each original image, four modified versions were created (Figure 2)  
489 which were used as difficult recognition probes to test each individual’s memory acuity for the  
490 14 images. Participants were instructed on the new task and completed a practice that included  
491 the five practice images shown during pre-scan training. The task involved four consecutive  
492 retrieval blocks separated by short breaks and, if needed, eye-tracking recalibration. For each  
493 trial, three images (757 by 522 pixels) from the set were presented consecutively in the center of  
494 a 1024 by 768 pixel screen for 1.5s each. Then, in a manner analogous to the in-scan retrieval  
495 task, an image title appeared in the center of the screen (1s; font = Courier New, font size = 30)  
496 that either matched the first (WM1), second (WM2) or third (WM3) image from the sequence, or  
497 that corresponded to an image from the set that was not included in the sequence (LTM; 1/4 of

498 trials were assigned to each condition). The title was followed immediately by a version of the  
499 corresponding image that was either intact or modified. Participants were given 6s to determine  
500 whether the image was intact or modified using a keyboard button press (right hand; 1 = intact, 2  
501 = modified). After 6s, the image was replaced by a 1s fixation cross (font size = 50) during  
502 which participants' response could still be recorded. The images shown in the 3-image sequence  
503 were always intact. Each of the four modified versions of an image appeared only once in the  
504 experiment (for a single trial), each in a different condition. During the inter-trial interval,  
505 participants were required to fixate on the inner portion of a small circle in the center of the  
506 screen. The experimenter pressed a button to correct for drifts in calibration and to trigger the  
507 onset of the next trial. Participants were informed they could move their gaze freely during the  
508 rest of the trial.

509 For each original image, the four modified versions (Figure 2) were arbitrarily labeled  
510 modified images 1 to 4. Across participants, we counterbalanced the conditions in which an  
511 image was tested within each block, the condition to which an image's modified version was  
512 attributed, and the block in which a modified image's version appeared.

## 513 Setup and Data Acquisition

514 Participants were scanned with a 3.0-T Siemens MAGNETOM Trio MRI scanner using a 12-  
515 channel head coil system. A high-resolution gradient-echo multi-slice T1-weighted scan coplanar  
516 with the echo-planar imaging scans (EPIs) was first acquired for localization. Functional images  
517 were acquired using a two-shot gradient-echo T2\*-weighted EPI sequence sensitive to BOLD  
518 contrast (22.5 x 22.5 cm field of view with a 96 x 96 matrix size, resulting in an in-plane

519 resolution of 2.35 x 2.35 mm for each of 26 3.5-mm axial slices with a 0.5-mm interslice gap;  
520 repetition time = 1.5 sec; echo time = 27ms; flip angle = 62 degrees). A high-resolution whole-  
521 brain magnetization prepared rapid gradient echo (MP-RAGE) 3-D T1 weighted scan (160 slices  
522 of 1mm thickness, 19.2 x 25.6 cm field of view) was also acquired for anatomical localization.

523 Both the in-scan and the post-scan task were programmed with Experiment Builder  
524 version 1.10.1025 (SR Research Ltd., Mississauga, Ontario, Canada). In the scanner, stimuli and  
525 button press responses were presented and recorded using EyeLink 1000 (SR Research Ltd.,  
526 Mississauga, Ontario, Canada). Visual stimuli were projected onto a screen behind the scanner  
527 made visible to the participant through a mirror mounted on the head coil. In-scan monocular eye  
528 movements were recorded with an EyeLink 1000 infrared video-graphic camera equipped with a  
529 telephoto lens (sampling rate 1000Hz) set up inside the scanner bore behind the participant's  
530 head. The camera picked up the pupil and corneal reflection from the right eye viewed from the  
531 flat surface mirror attached inside the radio frequency coil. Nine-point eye movement calibration  
532 was performed immediately before the first functional run. If needed, manual drift correction  
533 was performed mid-scan immediately prior to the onset of the next trial, and calibration was re-  
534 done in-between subsequent runs.

535 Post-scan stimuli were presented on a 19-in. Dell M991 monitor (resolution 1024x768)  
536 from a 24-inch distance. Monocular eye movements (the most accurate eye was selected during  
537 calibration) were recorded with a head-mounted Eyelink II eye tracker (sample rate 500 Hz) set  
538 to detect the pupil only. Eye movement calibration was performed at the beginning of the  
539 experiment, and drift correction ( $>5^\circ$ ), if needed, was performed immediately prior to the onset  
540 of each trial.

541 In-scan and post-scan eye tracking and behavioral data (vividness ratings, accuracy, and  
542 response time) were analyzed with Dataviewer version 1.11.1 (SR Research Ltd.). Saccades were  
543 determined using the built-in EyeLink saccade-detector heuristic. Acceleration (9500°/s/s) and  
544 velocity (30°/sec) thresholds were set to detect saccades greater than 0.5° of visual angle. Blinks  
545 were defined as periods in which the saccade-detector signal was missing for three or more  
546 samples in a sequence. Fixations were defined as the samples remaining after the categorization  
547 of saccades and blinks.

548 For the post-scan memory task, regions of interest (ROIs) were defined manually a priori  
549 for each image. A rectangular shape was drawn over each area of the image where a  
550 modification was introduced during the change-detection task, totaling four ROIs per image.  
551 Variations in the shape and orientation of these rectangles was dictated by the nature of the  
552 change, but strict counterbalancing insured that each variation was assigned to different  
553 conditions in a non-biased manner across participants.

## 554 **fMRI and Neural Reactivation Measures**

555 All statistical analyses were first conducted on realigned functional images in native EPI space.  
556 Functional images were converted into NIFTI-1 format, motion-corrected and realigned to the  
557 average image of the first run with AFNI's<sup>58</sup> *3dvolreg* program, and smoothed with a 4-mm  
558 FWHM Gaussian kernel. The maximum displacement for each EPI image relative to the  
559 reference image was recorded.

560 For each subject, shrinkage discriminant analysis<sup>59</sup> (SDA) was used to train a pattern  
561 classifier to discriminate between the set of 14 images using fMRI data from the encoding runs.

562 The full-brain, “all” ROI, pattern classifier was trained in two steps. First, a multivariate  
563 searchlight analysis using an 8mm radius and using leave-one-run-out cross-validation was used  
564 to detect regions with above chance performance in classifying the label associated with the 14  
565 images. The searchlight classification accuracy maps were then thresholded at  $Z > 1.65$   
566 (binomial distribution with chance accuracy =  $1/14$ ) to create separate feature masks for each  
567 subject (Figure 3A). A second SDA classifier was then trained on the encoding runs using all  
568 voxels falling inside the subject’s feature mask, producing a final full-brain classifier that could  
569 be used to evaluate image-specific reactivation during the retrieval task.

570 For the ROI reinstatement analyses, the subject-specific feature masks (Figure 3A) were  
571 divided into “dorsal”, “occipital” and “ventral” regions (Figure 3B), based upon Two-Streams  
572 hypothesis<sup>60</sup>—where “occipital” ROIs are not predominantly associated with one of the streams  
573 (see Supplementary Table 5 for a list of the FreeSurfer ROIs that compose each region). Three  
574 SDA classifiers per subject, one for each ROI, were then trained on the encoding runs using all  
575 voxels falling inside the subject’s feature mask and the ROI’s mask. In a similar manner,  
576 occipital pole and calcarine sulcus ROI analyses were performed with two SDA classifiers per  
577 subject, one for each ROI, but they were trained using all voxels within the corresponding  
578 FreeSurfer bilateral ROIs.

579 The SDA pattern classifiers trained on the set of encoding trials were then applied to data  
580 from the same brain regions acquired during the retrieval task. First, the time-series data for each  
581 individual memory trial was divided into 16 intervals of 1.5 seconds (spanning 0-24 s), where the  
582 first interval (0-1.5 s) is aligned to the start of the trial, which is defined as the onset of the first  
583 image from the three-image sequence (see Figure 1). Next, the SDA classifiers were applied to

584 each time-point of each retrieval trial, producing a time-course of classifier confidence for each  
585 trial. To control for the cortical activation caused by the recency condition (i.e. the three images  
586 shown at the onset of retrieval trials), we produced an “adjusted classifier confidence” (see  
587 Supplementary Figure 3 for an explanatory diagram). A trial’s classifier confidence was adjusted  
588 by subtracting the average classifier confidence for trials during which the target trial’s  
589 visualized image was shown in the same serial position (or not shown at all, as in the “LTM”  
590 condition), but was *not* retrieved (e.g. for a “WM2” trial where the visualized image “Baby  
591 Monkey” is shown in position 2, the average classifier confidence for all “non-WM2” trials  
592 where “Baby Monkey” is shown in position 2 is subtracted). With this metric, a value greater  
593 than 0 indicated neural reinstatement. The adjusted classifier confidence for each time-point was  
594 smoothed by convolving the data with a Gaussian filter ( $SD = 2$  seconds), and a single adjusted  
595 classifier confidence score was calculated for each trial by averaging across the five time-points  
596 corresponding to the visualization period (5.5-13 seconds offset by 6 seconds, i.e. 11.5-19s, to  
597 account for hemodynamic delay; the last 0.5 seconds were cut to avoid overlap with the  
598 vividness judgment).

## 599 Fixation Reinstatement Measure

600 Fixation reinstatement—the similarity between spatial fixation patterns during encoding and  
601 retrieval—was assessed by calculating the correlation between fixation density maps<sup>49,50</sup>. To  
602 create fixation density maps, a 3D Gaussian distribution was centered on each fixation made  
603 during the trial. The Gaussian’s “height” was proportional to the fixation’s duration and its width  
604 was such that one standard deviation was about 1 degree of visual angle, approximating the  
605 width of the fovea. For each pixel on the screen, the different Gaussians’ values (one per

606 fixation) at that pixel were summed, and the resulting map was normalized so that the sum over  
607 all pixel values was 1. To speed up computational processing time, maps were calculated at 1/32  
608 the resolution of the original screen.

609 Multiple studies have shown that the dispersion of fixations is lower when an image is  
610 visualized rather than perceived. This effect varies significantly between individuals<sup>14,17,45</sup> and is  
611 linked to differences in spatial imagery, so that participants with higher OSIVQ scores<sup>61</sup> have  
612 more spatially constrained fixations<sup>46</sup>. Counter-intuitively, those with superior spatial imagery  
613 may therefore show less similarity between encoding and retrieval fixation density maps. To  
614 control for this contraction of fixations during mental imagery, we aligned encoding and retrieval  
615 fixation density maps using the orthogonal Procrustes transformation<sup>47,48</sup>—a geometric  
616 transformation that uses translation, rotation and scaling to jointly minimize the distance between  
617 a two sets of paired points.

618 To calculate fixation similarity, we first generated encoding fixation maps by combining  
619 fixations made within the spatial boundaries of the image for the entire period when it was on  
620 screen. Encoding fixations were combined across trials for each subject-image combination (14  
621 encoding maps per subject). At retrieval, fixations were divided into 29 time windows that  
622 spanned the trial's visualization period (window duration/width = 1s, temporal distance between  
623 windows/stride = 0.25s), Fixations that straddled the border of a window had their durations  
624 limited to the duration spent within the window. Retrieval maps were created by pooling all  
625 fixations made within the on-screen rectangular visualization box, for each subject-image-time  
626 window combination (fixations were pooled across trials; 14\*29 maps per subject). Trial-specific  
627 retrieval maps were also generated for each subject-trial-time window combination (29 maps per



628 trial per subject). For cross-validation, we also generated retrieval maps for each subject-trial-  
629 time window combination that incorporated all fixations made by a subject within a certain time  
630 window during trials with the same target image as a particular trial (across conditions)—  
631 excluding that trial’s fixations.

632 To correct for each subject’s individual tendency to systematically alter fixations at  
633 retrieval, retrieval maps were aligned with encoding maps using the Procrustes transformation.  
634 Crucially, alignment parameters were calculated in a single step using a subject’s encoding and  
635 retrieval fixation data from all 14 stimulus images, yielding a transformation matrix that  
636 optimally rotates the set of retrieval fixation maps to match the set of encoding fixation maps.  
637 Thus, this method does not compute a separate transformation for each *image*, but rather  
638 discovers a single transformation that optimally aligns the two *sets* of 14 fixation maps.  
639 Moreover, to evaluate the test performance of the Procrustes method, a leave-one-out cross-  
640 validation approach was used in which the transform was calculated on all trials except for the  
641 “left out” test trial. Specifically, a separate Procrustes transformation matrix was calculated for  
642 each subject-trial-time window combination by jointly aligning two 14 by 768 matrices—one for  
643 encoding and one for retrieval. Matrix rows represented the 14 stimulus images, and columns  
644 represented pixel-specific elements from the vectorized fixation maps. Rows from a subject’s  
645 encoding matrix corresponded to vectorized encoding fixation maps (one map per image, with  
646 fixations combined over trials). A different retrieval matrix was created for each subject-trial-  
647 time window combination: elements from the target image’s row corresponded to the “cross-  
648 validation” fixation map that excluded that trial’s fixations but included fixations from other  
649 trials with the same target image made within the target time window. Other rows corresponded

650 to the other images' vectorized retrieval fixation maps (combined across trials) for the target time  
651 window.

652 For each subject-trial-time window combination, alignment resulted in a transformation  
653 matrix that was used to transform the fixation map specific to that retrieval trial and time  
654 window. The transformed retrieval fixation map was then correlated with each of the subject's  
655 14 encoding fixation maps (one for each image). To match the temporal profile of our neural  
656 reactivation measure, correlations for each of the 29 time windows were reduced to 5 values by  
657 convolving them with 5 Gaussians (means = 0.8, 2.4, 4.0, 5.6, 7.2 sec; SD = 2 sec); a single non-  
658 temporal correlation value was also calculated as the mean of the 5 temporal values. For both the  
659 5 temporal correlations and the non-temporal correlation, the final fixation reinstatement value  
660 was calculated as the difference (subtraction) between the correlation with the encoding fixation  
661 map corresponding to that trial's target image, and the average correlation with the other fixation  
662 maps for the non-target images. For this measure, a value greater than zero indicates fixation  
663 reinstatement.

## 664 Bootstrap and Randomization Statistics

665 All bootstrap statistics were calculated with 10000 samples. For the calculation of correlation  
666 statistics using a linear mixed effects (LME) model, bootstrap analyses were calculated with the  
667 BootMer function<sup>62</sup>. For the calculation of mean statistics using a LME model, an array was  
668 created with each dimension representing a random effect—in this case, participants (17 rows)  
669 and images (14 columns). Each element of the array is the mean value for the element's  
670 combination of random effects (e.g. row 3, column 5 contains the mean value for participant 3,

671 image 5). To generate a bootstrap distribution of the mean, 10000 new matrices were generated  
672 by randomly sampling the rows and columns of the original matrix with replacement, and then  
673 the 10000 means of the matrices' elements were calculated. For the paired-samples variant of the  
674 preceding procedure, each element of the array was a difference of means (i.e. the difference  
675 between the means generated by two different fixation similarity algorithms).

676 To address the possibility that the observed correlation between fixation reinstatement  
677 and neural reactivation was the result of *fMRI* signals directly caused by eye movements, as  
678 opposed to imagery-related neural activity patterns, we performed a randomization test. If the  
679 null hypothesis is true, then similarity between patterns of eye-movements made at encoding and  
680 at retrieval would result in greater correspondence between patterns of brain activity *irrespective*  
681 *of the image being brought to mind*. If so, then the similarity of retrieval fixation patterns made  
682 while visualizing image *x* to encoding fixation patterns made while perceiving image *y* should  
683 predict neural reactivation of image *y* to the same degree that fixation reinstatement of image *x*  
684 predicts neural reactivation of image *x*. We generated a null distribution by randomly reassigning  
685 the labels of the target images visualized during retrieval trials, and then re-calculating the  
686 correlation between fixation reinstatement and neural reactivation. Specifically, each retrieved  
687 image was randomly reassigned to another image from the set with two constraints: an image  
688 was never assigned to itself, and an image was never assigned to more than one image (i.e., all  
689 trials during which “Baby Monkey” was the retrieved image were assigned the same new label).  
690 After image assignment, all variables that were dependent on the identity of the retrieved image  
691 were recalculated (i.e. recency condition, fixation reinstatement, and neural reactivation), and the  
692 correlation between fixation reinstatement and neural reactivation was stored. This process was

693 repeated 1000 times, producing a 1000 sample null distribution, which was then compared to the  
694 original correlation between fixation reinstatement and neural reactivation.

## 695 Author Contributions

696 Conceptualization, M.B.B., B.R.B., M.S.; Methodology, M.B.B., B.R.B., M.S.; Software,  
697 M.B.B., B.R.B.; Formal Analysis, M.B.B., B.R.B., M.S.; Investigation, M.S., C.D., D.A.M.;  
698 Resources, C.D.; Data Curation, M.B.B., B.R.B.; Writing – Original Draft, M.B.B., M.S.,  
699 B.R.B.; Writing – Review and Editing, M.B.B., B.R.B., M.S., J.D.R., D.A.M.; Visualization,  
700 M.B.B., B.R.B., M.S.; Supervision, B.R.B., J.D.R.

## 701 Acknowledgements

702 We thank Morris Moscovitch and Jordana Wynn for their insightful discussions. This work was  
703 supported by a NSERC Discovery Award. There are no conflicts of interest.

## 704 Competing Interests

705 There are no competing interests.

## 706 References

- 707 1. Ishai, A., Haxby, J. V., and Ungerleider, L. G. (2002). Visual imagery of famous faces:  
708 effects of memory and attention revealed by fMRI. *Neuroimage*, 17(4), 1729-1741.
- 709 2. Slotnick, S. D., Thompson, W. L., and Kosslyn, S. M. (2005). Visual mental imagery

- 710 induces retinotopically organized activation of early visual areas. *Cerebral cortex*,  
711 15(10), 1570-1583.
- 712 3. Polyn, S. M., Natu, V. S., Cohen, J. D., and Norman, K. A. (2005). Category-specific  
713 cortical activity precedes retrieval during memory search. *Science*, 310(5756), 1963-  
714 1966.
- 715 4. Buchsbaum, B. R., Lemire-Rodger, S., Fang, C., and Abdi, H. (2012). The neural basis of  
716 vivid memory is patterned on perception. *Journal of Cognitive Neuroscience*, 24(9),  
717 1867-1883.
- 718 5. Naselaris, T., Olman, C. A., Stansbury, D. E., Ugurbil, K., and Gallant, J. L. (2015). A  
719 voxel-wise encoding model for early visual areas decodes mental images of remembered  
720 scenes. *Neuroimage*, 105, 215-228.
- 721 6. Johnson, M. R., and Johnson, M. K. (2014). Decoding individual natural scene  
722 representations during perception and imagery. *Frontiers in Human Neuroscience*, 8, 59.
- 723 7. Cabeza, R., Ritchey, M., and Wing, E. A. (2015). Reinstatement of Individual Past  
724 Events Revealed by the Similarity of Distributed Activation Patterns during Encoding  
725 and Retrieval. *Journal of cognitive Neuroscience*, 27(4), 679-691.
- 726 8. Chen, J., Leong, Y. C., Honey, C. J., Yong, C. H., Norman, K. A., and Hasson, U.  
727 (2017). Shared memories reveal shared structure in neural activity across individuals.  
728 *Nature Neuroscience*, 20(1), 115-125.
- 729 9. Bartlett, F. C. (1932). Remembering: An experimental and social study. *Cambridge:*

- 730            *Cambridge University.*
- 731            10. Hassabis, D., and Maguire, E. A. (2009). The construction system of the brain.
- 732            *Philosophical Transactions of the Royal Society of London B: Biological Sciences,*
- 733            364(1521), 1263-1271.
- 734            11. Hesslow, G. (2011). The current status of the simulation theory of cognition. *Brain*
- 735            *Research*, 1428(27), 71-79.
- 736            12. Hebb, D. O. (1968). Concerning imagery. *Psychological review*, 75(6), 466-477.
- 737            13. Noton, D., and Stark, L. (1971). Scanpaths in saccadic eye movements while viewing and
- 738            recognizing patterns. *Vision research*, 11(9), 929-IN8.
- 739            14. Brandt, S. A., and Stark, L. W. (1997). Spontaneous eye movements during visual
- 740            imagery reflect the content of the visual scene. *Journal of cognitive neuroscience*, 9(1),
- 741            27-38.
- 742            15. Richardson, D. C., and Spivey, M. J. (2000). Representation, space and Hollywood
- 743            Squares: Looking at things that aren't there anymore. *Cognition*, 76(3), 269-295.
- 744            16. Laeng, B., and Teodorescu, D. S. (2002). Eye scanpaths during visual imagery reenact
- 745            those of perception of the same visual scene. *Cognitive Science*, 26, 207-231.
- 746            17. Johansson, R., Holsanova, J., and Holmqvist, K. (2006). Pictures and spoken descriptions
- 747            elicit similar eye movements during mental imagery, both in light and in complete
- 748            darkness. *Cognitive Science*, 30(6), 1053-1079.

- 749 18. Johansson, R., Holsanova, J., Dewhurst, R., and Holmqvist, K. (2012). Eye Movements  
750 During Scene Recollection Have a Functional Role, but They Are Not Reinstatements of  
751 Those Produced During Encoding. *Journal of Experimental Psychology: Human*  
752 *perception and performance*, 38(5), 1289.
- 753 19. Wynn, J. S., Bone, M. B., Dragan, M. C., Hoffman, K. L., Buchsbaum, B. R., and Ryan,  
754 J. D. (2016). Selective scanpath repetition during memory-guided visual search. *Visual*  
755 *Cognition*, 24(1), 15-37.
- 756 20. Haxby, J. V. (2012). Multivariate pattern analysis of fMRI: the early beginnings.  
757 *Neuroimage*, 62(2), 852-855.
- 758 21. Rissman, J., and Wagner, A. D. (2012). Distributed representations in memory: Insights  
759 from functional brain imaging. *Annual Review of Psychology*, 63, 101–128.
- 760 22. Danker, J. F., & Anderson, J. R. (2010). The ghosts of brain states past: remembering  
761 reactivates the brain regions engaged during encoding. *Psychological bulletin*, 136(1), 87.
- 762 23. Ganis, G., Thompson, W. L., and Kosslyn, S. M. (2004). Brain areas underlying visual  
763 mental imagery and visual perception: an fMRI study. *Cognitive Brain Research*, 20(2),  
764 226-241.
- 765 24. St-Laurent, M., Abdi, H., Bondad, A., and Buchsbaum, B. R. (2014). Memory  
766 reactivation in healthy aging: evidence of stimulus-specific dedifferentiation. *The Journal*  
767 *of Neuroscience*, 34(12), 4175.
- 768 25. Cui, X., Jeter, C. B., Yang, D., Montague, P. R., and Eagleman, D. M. (2007). Vividness

- 769 of mental imagery: individual variability can be measured objectively. *Vision research*,  
770 47(4), 474-478.
- 771 26. St-Laurent, M., Abdi, H., and Buchsbaum, B. R. (2015). Distributed Patterns of  
772 Reactivation Predict Vividness of Recollection. *Journal of Cognitive Neuroscience*,  
773 27(10), 2000-2018.
- 774 27. Johnson, M. K., Kuhl, B. A., Mitchell, K. J., Ankudowich, E., and Durbin, K. A. (2015).  
775 Age-related differences in the neural basis of the subjective vividness of memories:  
776 Evidence from multivoxel pattern classification. *Cognitive, Affective, and Behavioral*  
777 *Neuroscience*, 15(3), 644-661.
- 778 28. Dijkstra, N., Bosch, S., and van Gerven, M. A. (2017). Vividness of Visual Imagery  
779 Depends on the Neural Overlap with Perception in Visual Areas. *Journal of*  
780 *Neuroscience*, 3022-16.
- 781 29. Felleman, D.J., and Van Essen, D.C. (1991). Distributed hierarchical processing in the  
782 primate cerebral cortex. *Cerebral Cortex*, 1(1), 1-47.
- 783 30. Logothetis, N.K., and Sheinberg, D.L. (1996). Visual object recognition. *Annual Review*  
784 *of Neuroscience*, 19, 577-621.
- 785 31. Vogels, R., and Orban, G. A. (1994). Activity of inferior temporal neurons during  
786 orientation discrimination with successively presented gratings. *Journal of*  
787 *Neurophysiology*, 71(4), 1428-1451.
- 788 32. DiCarlo, J. J., Zoccolan, D., and Rust, N. C. (2012). How does the brain solve visual



- 789 object recognition?. *Neuron*, 73(3), 415-434.
- 790 33. Kosslyn, S. M., Thompson, W. L., and Ganis, G. (2006). The case for mental imagery  
791 (New York, NY: Oxford University Press).
- 792 34. Pylyshyn, Z. W. (2002). Mental imagery: In search of a theory. *Behavioral and brain*  
793 *sciences*, 25(02), 157-182.
- 794 35. Thirion, B., Duchesnay, E., Hubbard, E., Dubois, J., Poline, J. B., Lebihan, D., and  
795 Dehaene, S. (2006). Inverse retinotopy: inferring the visual content of images from brain  
796 activation patterns. *Neuroimage*, 33(4), 1104-1116.
- 797 36. Lee, S. H., Kravitz, D. J., and Baker, C. I. (2012). Disentangling visual imagery and  
798 perception of real-world objects. *Neuroimage*, 59(4), 4064-4073.
- 799 37. Altmann, G. T. (2004). Language-mediated eye movements in the absence of a visual  
800 world: The 'blank screen paradigm'. *Cognition*, 93(2), B79-B87.
- 801 38. Laeng, B., Bloem, I. M., D'Ascenzo, S., and Tommasi, L. (2014). Scrutinizing visual  
802 images: The role of gaze in mental imagery and memory. *Cognition*, 131(2), 263-283.
- 803 39. Johansson, R., and Johansson, M. (2014). Look here, eye movements play a functional  
804 role in memory retrieval. *Psychological Science*, 25(1), 236-242.
- 805 40. Spivey, M. J., and Geng, J. J. (2001). Oculomotor mechanisms activated by imagery and  
806 memory: Eye movements to absent objects. *Psychological research*, 65(4), 235-241.
- 807 41. Martarelli, C. S., and Mast, F. W. (2013). Eye movements during long-term pictorial

- 808 recall. *Psychological research*, 77(3), 303-309.
- 809 42. Ferreira, F., Apel, J., and Henderson, J. M. (2008). Taking a new look at looking at  
810 nothing. *Trends in cognitive sciences*, 12(11), 405-410.
- 811 43. Richardson, D. C., Altmann, G. T., Spivey, M. J., and Hoover, M. A. (2009). Much ado  
812 about eye movements to nothing: a response to Ferreira et al.: Taking a new look at  
813 looking at nothing. *Trends in Cognitive Sciences*, 13(6), 235-236.
- 814 44. Kriegeskorte, N., Mur, M., and Bandettini, P. A. (2008). Representational similarity  
815 analysis-connecting the branches of systems neuroscience. *Frontiers in Systems*  
816 *Neuroscience*, 2, 4.
- 817 45. Gbadamosi, J., and Zangemeister, W. H. (2001). Visual imagery in hemianopic patients.  
818 *Journal of Cognitive Neuroscience*, 13(7), 855-866.
- 819 46. Johansson, R., Holsanova, J., and Holmqvist, K. (2011). The Dispersion of Eye  
820 Movements During Visual Imagery is Related to Individual Differences in Spatial  
821 Imagery Ability. *Proceedings of the 33rd Annual Meeting of the Cognitive Science*  
822 *Society*, 1200-1205.
- 823 47. Bibby, J. M., Kent, J. T., & Mardia, K. V. (1979). Multivariate analysis.
- 824 48. Wang, C., & Mahadevan, S. (2008, July). Manifold alignment using procrustes analysis.  
825 In Proceedings of the 25th international conference on Machine learning (pp. 1120-  
826 1127). ACM.

- 827 49. Pomplun, M., Ritter, H., and Velichkovsky, B. (1996). Disambiguating complex visual  
828 information: towards communication of personal views of a scene. *Perception*, 25(8),  
829 931.
- 830 50. Wooding, D. S. (2002). Eye movements of large populations: II. Deriving regions of  
831 interest, coverage, and similarity using fixation maps. *Behavior Research Methods,*  
832 *Instruments, and Computers*, 34(4), 518-528.
- 833 51. Kriegeskorte, N. (2011). Pattern-information analysis: from stimulus decoding to  
834 computational-model testing. *Neuroimage*, 56(2), 411-421.
- 835 52. Lewis-Peacock, J. A., Drysdale, A. T., Oberauer, K., and Postle, B. R. (2012). Neural  
836 evidence for a distinction between short-term memory and the focus of attention. *Journal*  
837 *of Cognitive Neuroscience*, 24(1), 61-79.
- 838 53. Hale, S. M., and Simpson, H. M. (1971). Effects of eye movements on rate of discovery  
839 and vividness of visual images. *Perception and Psychophysics*, 9(2B), 242–246.
- 840 54. de Vito, S., Buonocore, A., Bonnefon, J. F., and Della Sala, S. (2014). Eye movements  
841 disrupt spatial but not visual mental imagery. *Cognitive processing*, 15(4), 543-549.
- 842 55. Blanke, O., and Seeck, M. (2003). Direction of saccadic and smooth eye movements  
843 induced by electrical stimulation of the human frontal eye field: effect of orbital position.  
844 *Experimental brain research*, 150(2), 174-183.
- 845 56. Williams, A. L., and Smith, A. T. (2010). Representation of eye position in the human  
846 parietal cortex. *Journal of Neurophysiology*, 104(4), 2169-2177.

- 847 57. DeYoe, E. A., Carman, G. J., Bandettini, P., Glickman, S., Wieser, J., Cox, R., Miller, D.,  
848 and Neitz, J. (1996). Mapping striate and extrastriate visual areas in human cerebral  
849 cortex. *Proceedings of the National Academy of Sciences*, 93(6), 2382-2386.
- 850 58. Cox, R. W. (1996). AFNI: software for analysis and visualization of functional magnetic  
851 resonance neuroimages. *Computers and Biomedical research*, 29(3), 162-173.
- 852 59. Ahdesmäki, M., Zuber, V., Gibb, S., and Strimmer, K. (2014). Shrinkage Discriminant  
853 Analysis and CAT Score Variable Selection. URL: <http://strimmerlab.org/software/sda>.
- 854 60. Goodale, M. A., and Milner, A. D. (1992). Separate visual pathways for perception and  
855 action. *Trends in neurosciences*, 15(1), 20-25.
- 856 61. Blazhenkova, O., and Kozhevnikov, M. (2009). The new object-spatial-verbal cognitive  
857 style model: Theory and measurement. *Applied cognitive psychology*, 23(5), 638-663.
- 858 62. Bates, D., Maechler, M., Bolker, B., Walker S. (2015). Fitting Linear Mixed-Effects  
859 Models Using lme4. *Journal of Statistical Software*, 67(1), 1-48.
